# Supplementary material for: Human body burden of Bisphenol A: a case study of lactating mothers in Florianopolis, Brazil
Source: Research Square preprint supplement (doi:10.21203/rs.3.rs-1412939/v1), 2022-04-22
Supplement: Supplementary file 1 [file ea8e499d897ed5a940f8ac7a.docx]

**Human body burden of Bisphenol A: a case study of lactating mothers in Florianopolis. Brazil**

Carolina Dumke de Siqueiraa (https://orcid.org/0000-0002-9777-3987). Alabi Okunola Adenreleb (https://orcid.org/0000-0002-0807-9521). Ana Carolina Rabello de Moraesc (https://orcid.org/0000-0003-1088-472X). Fabíola Branco Filippin-Monteiroc (https://orcid.org/0000-0002-0826-2692)

aPost-Graduation Program in Pharmacy. Health Sciences Centre. Universidade Federal de Santa Catarina. Florianópolis. SC. Brazil

bDepartment of Biology. Federal University of Technology. Akure. Nigeria

cDepartment of Clinical Analysis. Health Sciences Centre. Universidade Federal de Santa Catarina. Florianópolis. SC. Brazil

**Running title:** Human body burden of Bisphenol A

Address correspondence to Fabíola Branco Filippin Monteiro

Campus Universitário. Universidade Federal de Santa Catarina. Trindade

88040900. Florianópolis. SC. Brasil.

[fabiola.monteiro@ufsc.br](mailto:fabiola.monteiro@ufsc.br)

**Original Article**

**Supplementary material 1.** BPA concentrations in the breast milk of all 64 patients.

| **Patient number** | **BPA concentration (ng/mL)** |
| --- | --- |
| 17 | 29.3877551 |
| 18 | 35.10204082 |
| 19 | 33.87755102 |
| 20 | 28.36734694 |
| 21 | 34.48979592 |
| 22 | 27.34693878 |
| 23 | 55.10204082 |
| 24 | 27.75510204 |
| 25 | 35.91836735 |
| 26 | 27.55102041 |
| 27 | 31.02040816 |
| 28 | 27.55102041 |
| 29 | 45.91836735 |
| 30 | 29.79591837 |
| 31 | 34.69387755 |
| 32 | 29.18367347 |
| 33 | 31.83673469 |
| 34 | 29.59183673 |
| 35 | 47.55102041 |
| 36 | 27.75510204 |
| 37 | 40.6122449 |
| 38 | 37.14285714 |
| 39 | 32.24489796 |
| 40 | 37.55102041 |
| 41 | 87.34693878 |
| 42 | 29.59183673 |
| 43 | 147.5510204 |
| 44 | 27.34693878 |
| 45 | 35.30612245 |
| 46 | 29.18367347 |
| 47 | 49.3877551 |
| 48 | 36.32653061 |
| 49 | 30.40816327 |
| 50 | 87.34693878 |
| 51 | 36.12244898 |
| 52 | 56.73469388 |
| 53 | 40 |
| 54 | 29.79591837 |
| 55 | 53.67346939 |
| 56 | 30 |
| 57 | 36.32653061 |
| 58 | 28.97959184 |
| 59 | 33.67346939 |
| 60 | 30 |
| 61 | 44.89795918 |
| 62 | 30 |
| 63 | 47.95918367 |
| 64 | 31.63265306 |
| 65 | 41.2244898 |
| 66 | 36.12244898 |
| 67 | 88.7755102 |
| 68 | 34.48979592 |
| 69 | 37.75510204 |
| 70 | 25.71428571 |
| 71 | 29.3877551 |
| 72 | 29.18367347 |
| 73 | 39.79591837 |
| 74 | 35.10204082 |
| 75 | 38.36734694 |
| 76 | 30.40816327 |
| 77 | 203.2653061 |
| 78 | 29.18367347 |
| 79 | 30.20408163 |
| 80 | 31.42857143 |
